# Supplementary material
Source: ML conference proceedings conference paper supplement (https://openreview.net/forum?id=Kg6CSrbXl4)

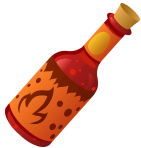

TABASCO

Supplement: supplementary_material [file tabaso_logo.pdf › tabasco-EBC8/figures/tabaso_logo.pdf]
